# Supplementary material
Source: HighWire-hosted journal article supplement (http://molpharm.aspetjournals.org/highwire/filestream/77125/field_highwire_adjunct_files/0/Supplementry_Data_-_20121022.pdf)
Supplement: Supplementry_Data_-_20121022.pdf [file Supplementry_Data_-_20121022.pdf]

**Targeting the Metastasis Suppressor, NDRG1, Using Novel Iron Chelators:  
Regulation of Stress Fiber-Mediated Tumor Cell Migration *via* Modulation of the  
ROCK1/pMLC2 Signaling Pathway**

**Jing Sun , Daohai Zhang , Ying Zheng, Qian Zhao, Minhua Zheng , Zaklina  
Kovacevic and Des R. Richardson**

**Molecular Pharmacology**

**Supplementary Data**

**Supplementary Figure 1.** Wound-healing assays confirm the effect of NDRG1 expression on inhibiting the migration of DU145, HT29 and HCT116 cells.

**Supplementary Figure 2.** Co-localization of pMLC2 together with F-actin, forming stress fibers after NDRG1 was knocked down in: (A) DU145, (B) HT29 and (C) HCT116 cells.

**Supplementary Figure 3.** The ROCK1 inhibitor, Y27632, inhibits MLC2 phosphorylation and stress fiber formation in DU145, HT29, and HCT116 cells.

**Supplementary Figure 4.** Iron chelators inhibit stress fiber assembly and MLC2 phosphorylation in DU145 cells.

**Supplementary Figure 5.** Iron chelators inhibit stress fiber assembly and MLC2 phosphorylation in HT29 cells.

**Supplementary Figure 6.** Iron chelators inhibit stress fiber assembly and MLC2 phosphorylation in HCT116 cells.

Targeting the Metastasis Suppressor, NDRG1, Using Novel Iron Chelators: Regulation of Stress Fiber-Mediated Tumor Cell Migration via Modulation of the ROCK1/pMLC2 Signaling Pathway

Jing Sun , Daohai Zhang , Ying Zheng, Qian Zhao, Minhua Zheng , Zaklina Kovacevic and Des R. Richardson

Molecular Pharmacology

Supplementary Figure 1

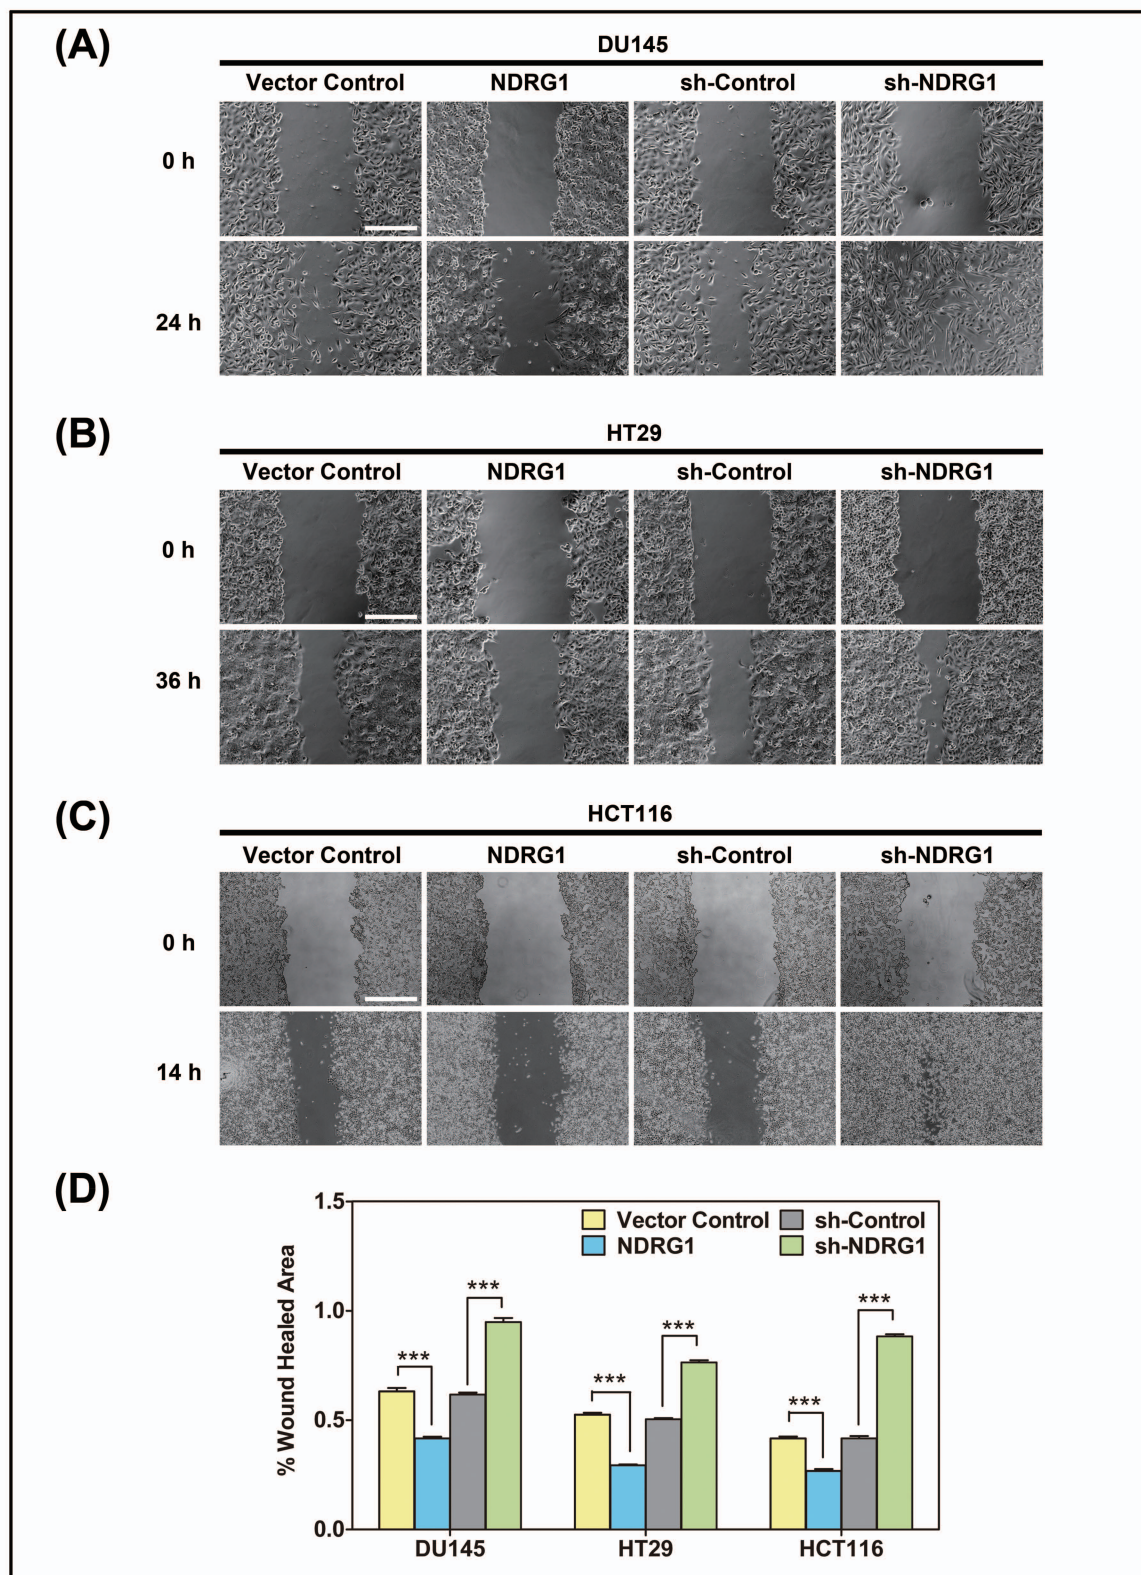

**Supplementary Figure 1. Wound-healing assays confirm the effect of NDRG1 expression on inhibiting the migration of DU145, HT29 and HCT116 cells.** (A-C) The DU145, HT29 and HCT116 NDRG1 over-expression and knockdown clones, as well as relative control cells (Vector Control and sh-Control), were seeded into 12-well plates (2% gelatin coated) until they reached confluence. A wound was then created by manually scraping the cell monolayer with a Gilson p200 pipette tip. Images were acquired using an Olympus IX50 inverted microscope (Olympus, Tokyo, Japan) with a 10× objective at: (A) 0 h and 24 h (DU145 cells); (B) 0 h and 36 h (HT29 cells) and (C) 0 h and 14 h (HCT116 cells). The migrated area was quantitated using the program Image J to analyze cell migration ability. Scale bar: 1 mm. (D) Quantitative analysis of cell migration ability after NDRG1 over-expression and knockdown was performed by comparing the wound area that cells migrated into from the starting point (0 h) to the end point (24 h for DU145 cells, 36 h for HT29 cells and 14 h for HCT116 cells). Results are typical of 3-5 images from different visual fields and the histogram values are mean ± SD (3-5 images). \*\*\* $p < 0.001$ , relative to Vector Control or sh-Control cells.

Targeting the Metastasis Suppressor, NDRG1, Using Novel Iron Chelators: Regulation of Stress Fiber-Mediated Tumor Cell Migration via Modulation of the ROCK1/pMLC2 Signaling Pathway

Jing Sun , Daohai Zhang , Ying Zheng, Qian Zhao, Minhua Zheng , Zaklina Kovacevic and Des R. Richardson

Molecular Pharmacology

Supplementary Figure 2

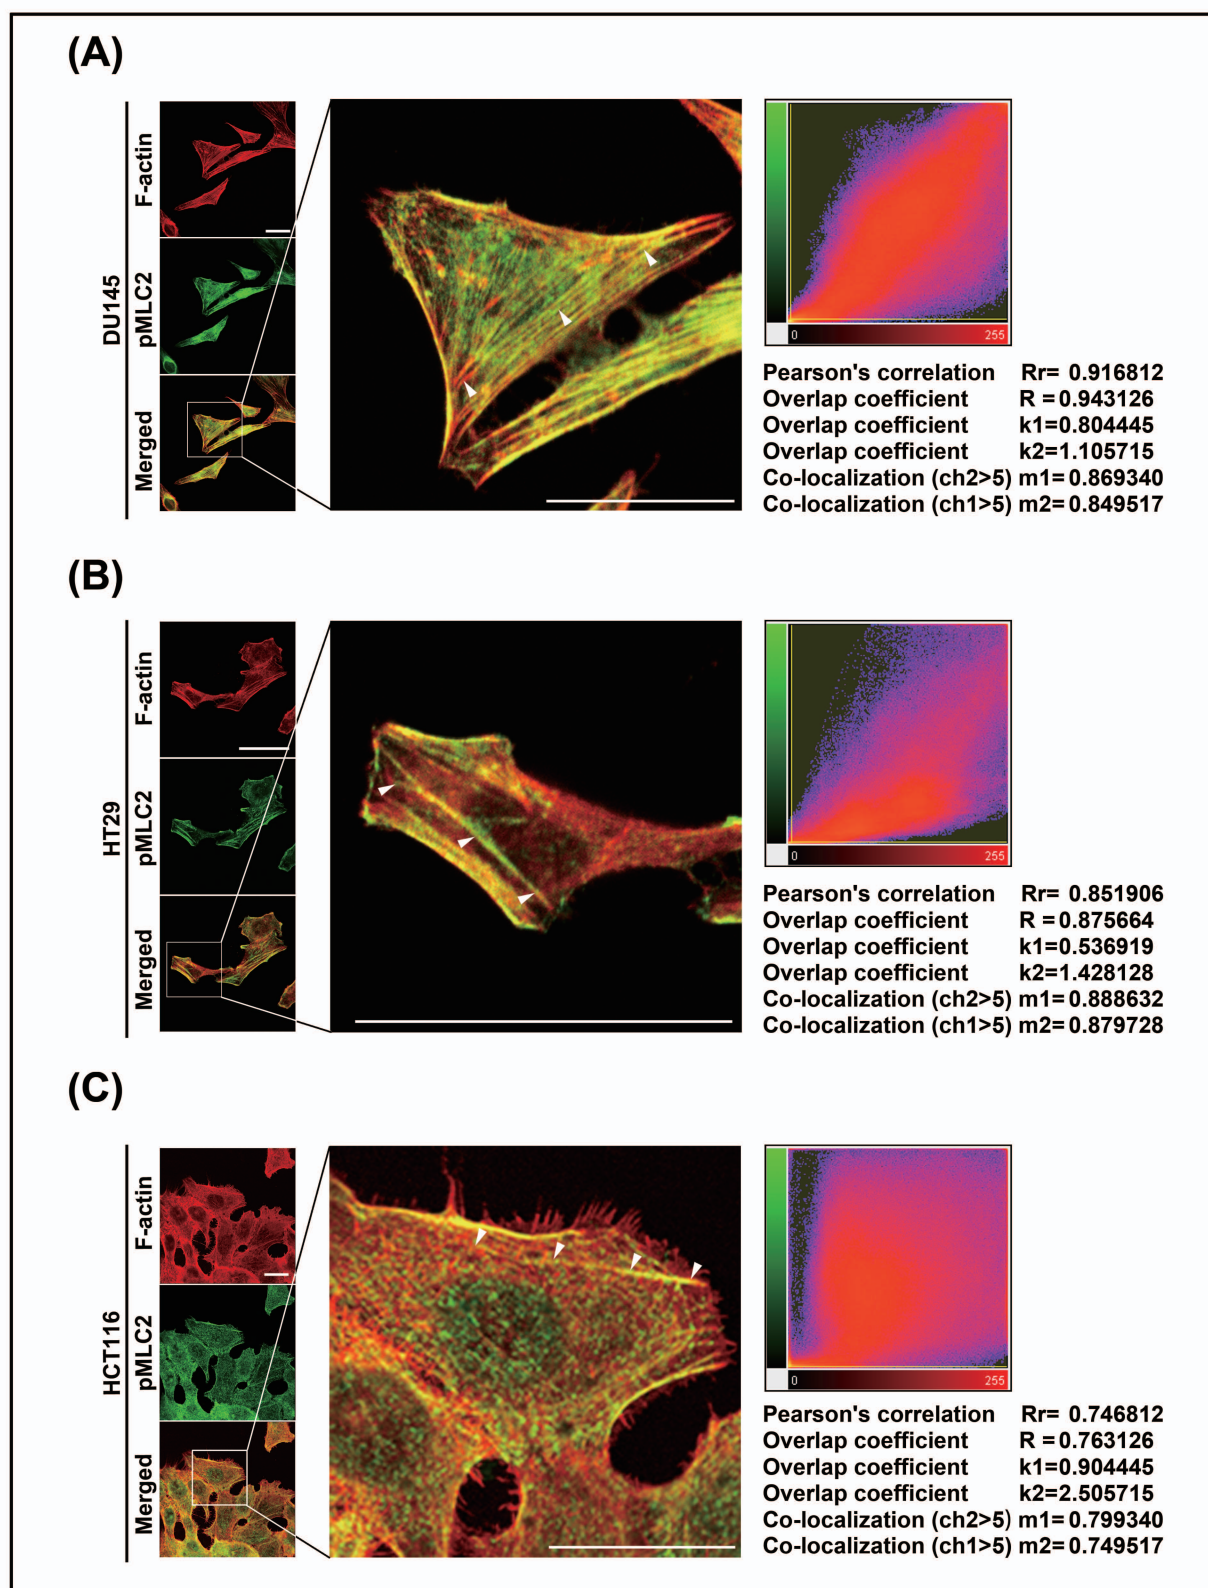

**Supplementary Figure 2. Co-localization of pMLC2 together with F-actin, forming stress fibers after NDRG1 was knocked down in: (A) DU145, (B) HT29 and (C) HCT116 cells.** Merged immunofluorescence images from Fig. 5A-C in the main text were enlarged to show F-actin (red) stained with rhodamine phalloidin and pMLC2 (green) stained with Alexa Fluor® 488 in NDRG1-knockdown DU145, HT29 and HCT116 cells. There were high correlation coefficients (Pearson's correlation: 0.75-0.92) between F-actin and pMLC2 in all three cell-types, indicating pMLC2 co-localized together with F-actin, forming filament bundles when NDRG1 was knocked down. White arrows indicate stress fibers. Scale bar: 25  $\mu$ m. Co-localization analysis was performed using the program, Imaris 7.3.

Targeting the Metastasis Suppressor, NDRG1, Using Novel Iron Chelators: Regulation of Stress Fiber-Mediated Tumor Cell Migration via Modulation of the ROCK1/pMLC2 Signaling Pathway

Jing Sun , Daohai Zhang , Ying Zheng, Qian Zhao, Minhua Zheng , Zaklina Kovacevic and Des R. Richardson

Molecular Pharmacology

Supplementary Figure 3

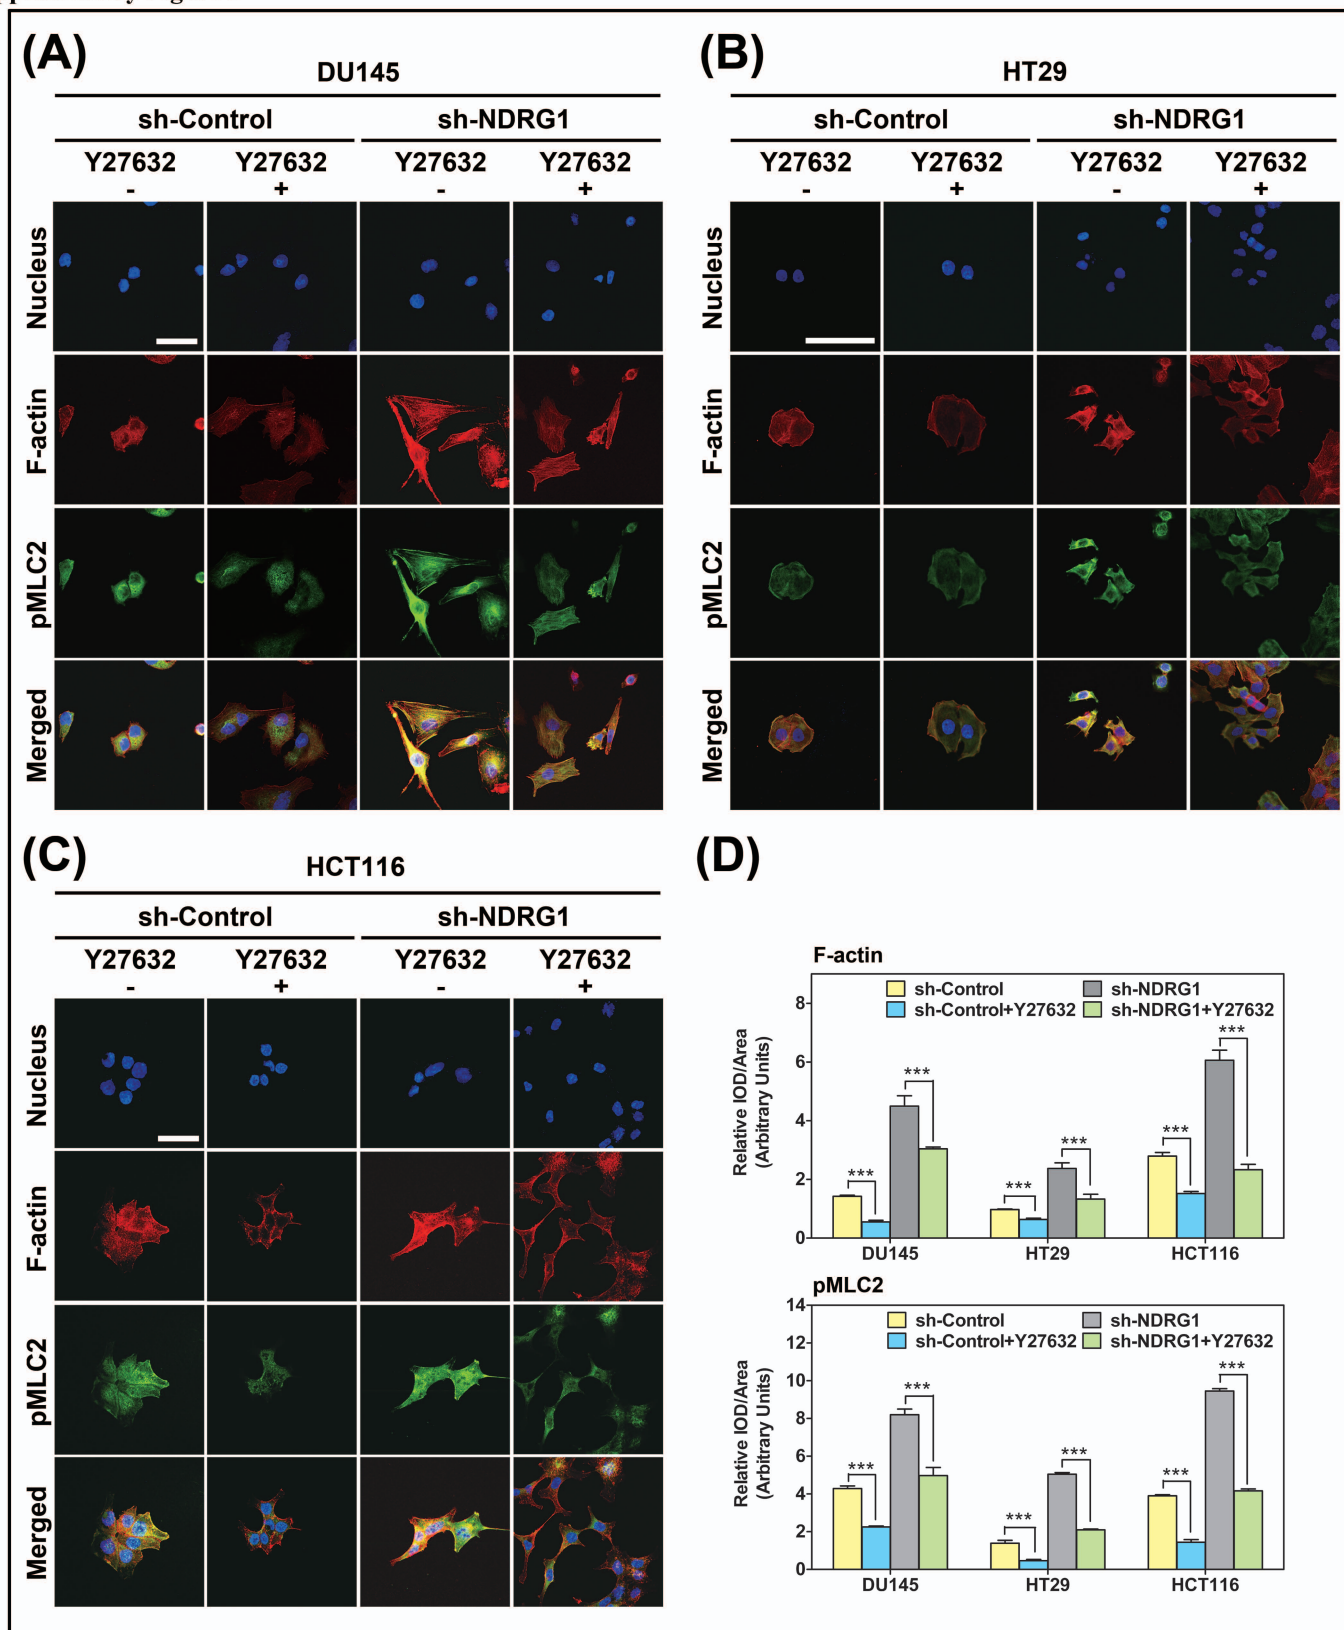

**Supplementary Figure 3. The ROCK1 inhibitor, Y27632, inhibits MLC2 phosphorylation and stress fiber formation in DU145, HT29, and HCT116 cells.** (A-C) The sh-NDRG1 cells as well as the relative sh-Control cells in the DU145, HT29 and HCT116 cell lines were incubated with the ROCK1 inhibitor, Y27632 (2.5  $\mu$ M) for 48 h. Merged immunofluorescence images demonstrate F-actin (red) stained with rhodamine phalloidin, pMLC2 (green) stained with Alexa Fluor<sup>®</sup> 488 and the cell nucleus (blue) stained with DAPI. Scale bars: 25  $\mu$ m. (D) Fluorescence quantification was performed by comparing the integrated optical density (IOD)/Area value of F-actin and pMLC2 to the IOD/Area value of nucleus (DAPI) in the same image. Results are typical of 3-5 images from different visual fields and the histogram values are mean  $\pm$  SD (3-5 images). \*\*\*  $p < 0.001$ , relative to the respective control cells.

Targeting the Metastasis Suppressor, NDRG1, Using Novel Iron Chelators: Regulation of Stress Fiber-Mediated Tumor Cell Migration via Modulation of the ROCK1/pMLC2 Signaling Pathway

Jing Sun , Daohai Zhang , Ying Zheng, Qian Zhao, Minhua Zheng , Zaklina Kovacevic and Des R. Richardson

Molecular Pharmacology

Supplementary Figure 4

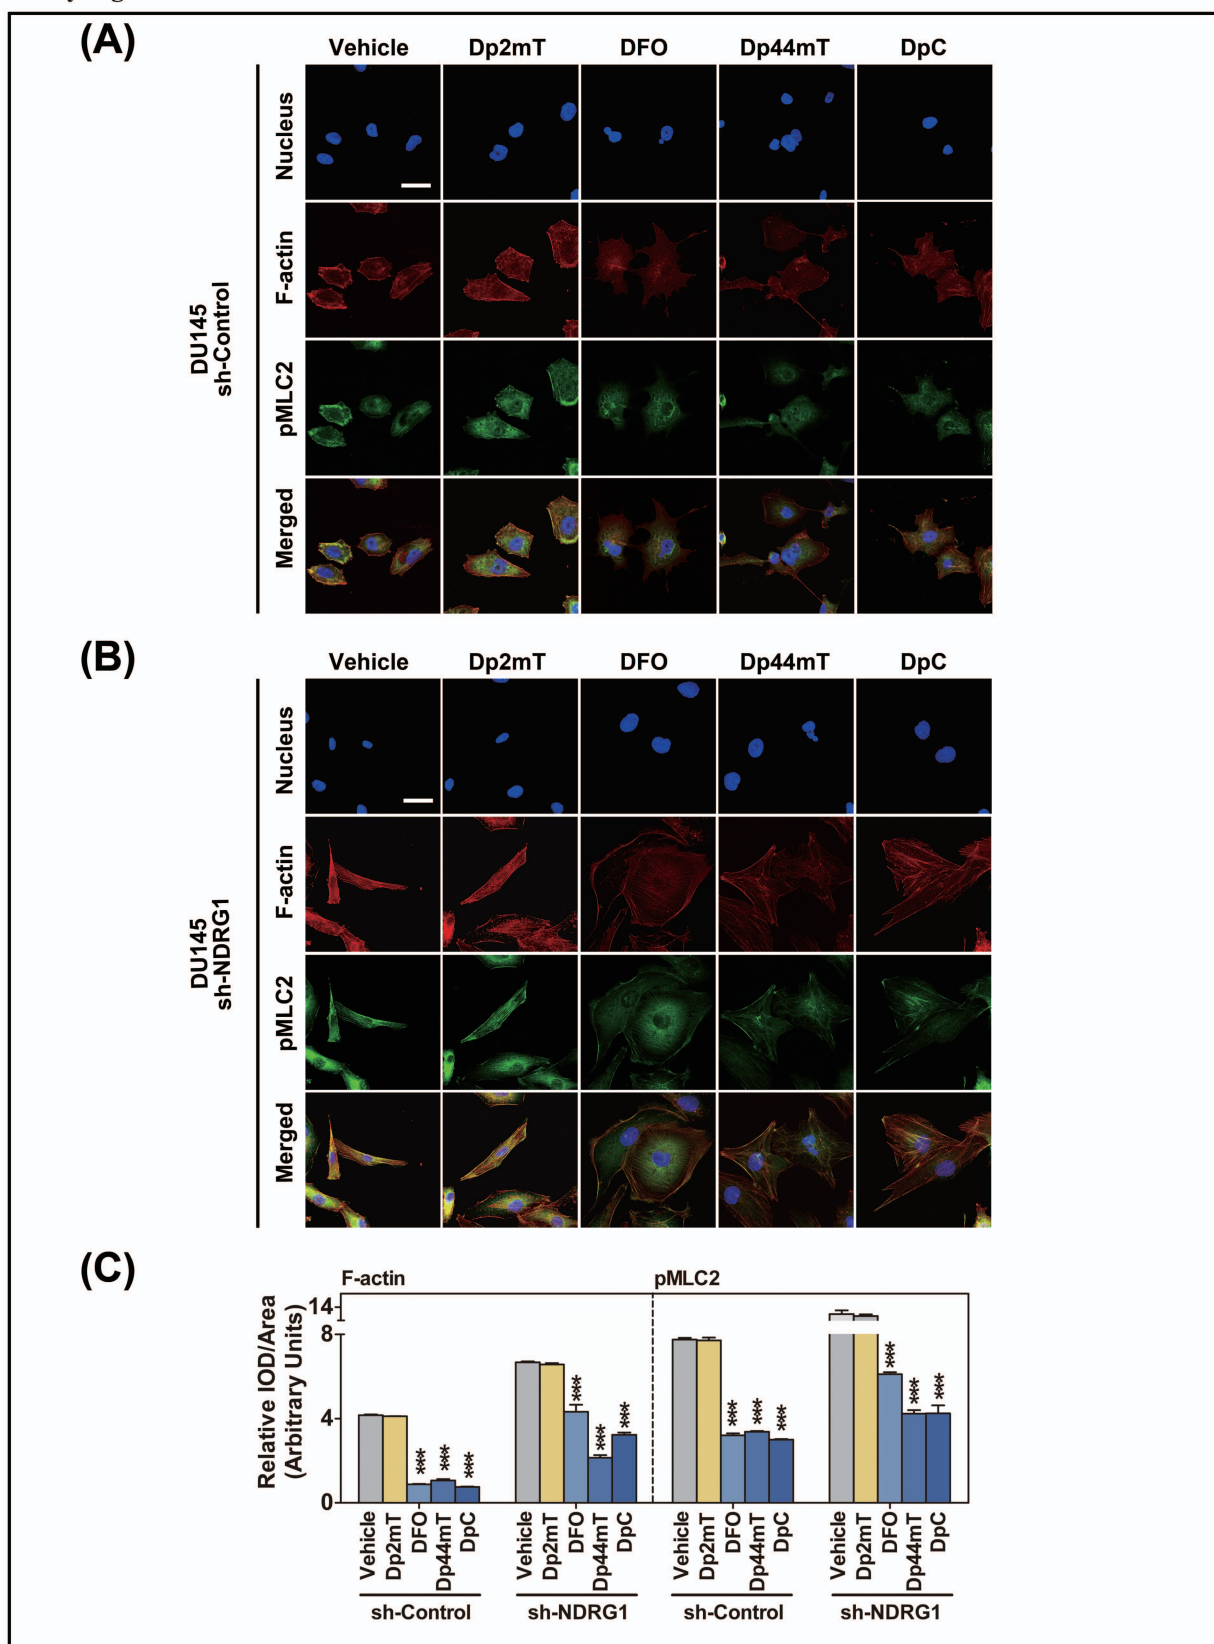

**Supplementary Figure 4. Iron chelators inhibit stress fiber assembly and MLC2 phosphorylation in DU145 cells.** (A) The DU145 sh-Control cells and (B) DU145 sh-NDRG1 cells were incubated with either: Vehicle control (0.1% DMSO/medium), Dp2mT (10  $\mu$ M), DFO (100  $\mu$ M), Dp44mT (10  $\mu$ M) or DpC (10  $\mu$ M) for 24 h. Incubation of both sh-NDRG1 and sh-Control cells with chelators showed an enlarged, epithelial-like phenotype. Moreover, stress fibers as assessed by F-actin staining were less evident in chelator-treated cells relative to those treated with Vehicle or Dp2mT. Scale Bar: 25  $\mu$ m. (C) Fluorescence quantification of both F-actin and pMLC2 expression showed an inhibitory effect after incubation with iron chelators. Results in (A) and (B) are typical of 3 experiments, while the densitometry is mean  $\pm$  SD (3 experiments). \*\*\*  $p < 0.001$ , relative to cells incubated with the Vehicle or Dp2mT.

Targeting the Metastasis Suppressor, NDRG1, Using Novel Iron Chelators: Regulation of Stress Fiber-Mediated Tumor Cell Migration via Modulation of the ROCK1/pMLC2 Signaling Pathway

Jing Sun , Daohai Zhang , Ying Zheng, Qian Zhao, Minhua Zheng , Zaklina Kovacevic and Des R. Richardson

Molecular Pharmacology

Supplementary Figure 5

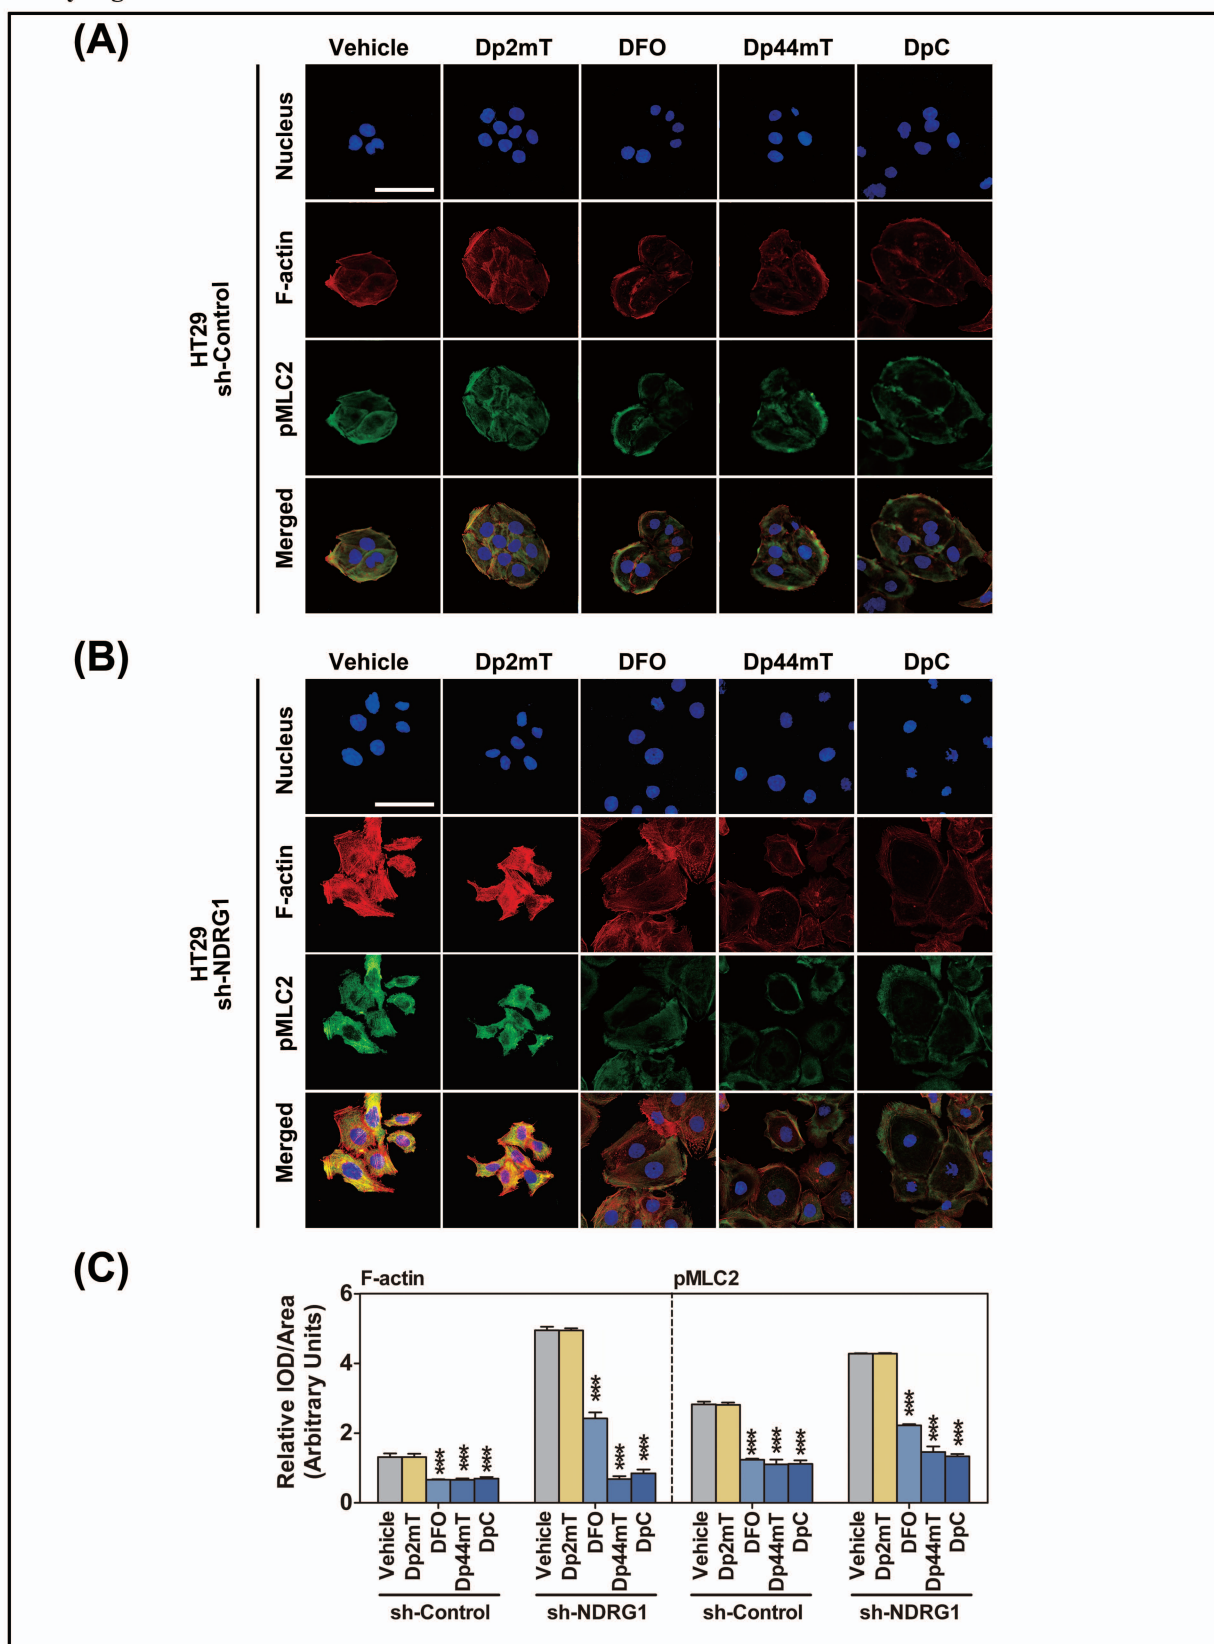

**Supplementary Figure 5. Iron chelators inhibit stress fiber assembly and MLC2 phosphorylation in HT29 cells.** (A) The HT29 sh-Control cells and (B) HT29 sh-NDRG1 cells were incubated as described in the legend of Supplementary Figure 4. Incubation of sh-NDRG1 and sh-Control cells with chelators resulted in an enlarged, epithelial-like phenotype. Moreover, stress fibers were less evident in chelator-treated cells relative to those treated with the Vehicle or Dp2mT. The staining of F-actin and pMLC2 were re-localized to a cortical location at the cell membrane after incubation of sh-NDRG1 cells with chelators. Scale Bar: 25  $\mu$ m. (C) Fluorescence quantification for both F-actin and pMLC2 expression showed an inhibitory effect of chelator treatment. Results in (A) and (B) are typical of 3 experiments, while the densitometry is mean  $\pm$  SD (3 experiments). \*\*\*  $p < 0.001$ , relative to cells incubated with the Vehicle or Dp2mT.

Targeting the Metastasis Suppressor, NDRG1, Using Novel Iron Chelators: Regulation of Stress Fiber-Mediated Tumor Cell Migration via Modulation of the ROCK1/pMLC2 Signaling Pathway

Jing Sun , Daohai Zhang , Ying Zheng, Qian Zhao, Minhua Zheng , Zaklina Kovacevic and Des R. Richardson

Molecular Pharmacology

Supplementary Figure 6

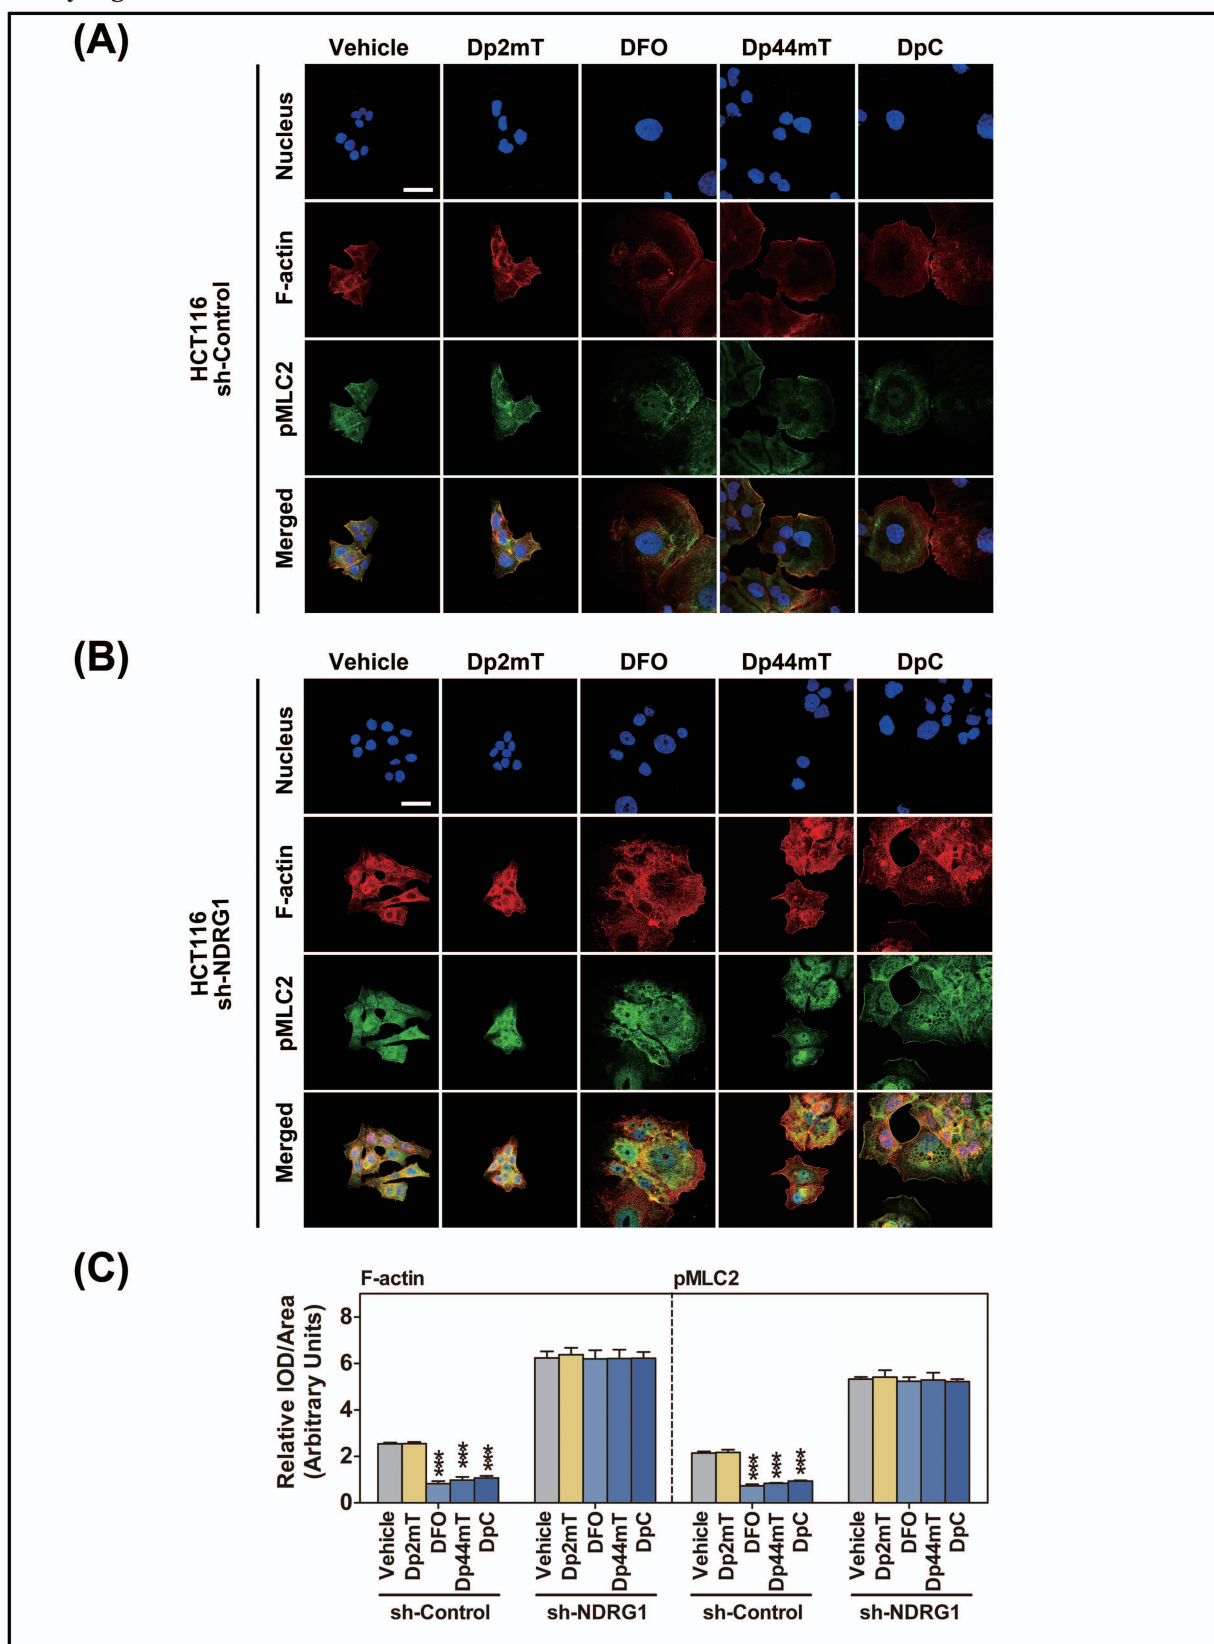

**Supplementary Figure 6. Iron chelators inhibit stress fiber assembly and MLC2 phosphorylation in HCT116 cells.** (A-B) The HCT116 sh-NDRG1 as well as sh-Control cells were incubated as described in the legend of Supplementary Figure 4. After incubation with chelators, both sh-NDRG1 cells and sh-Control cells showed an enlarged, epithelial-like phenotype. Examining sh-Control cells, incubation with chelators reduced the fluorescent staining of both F-actin and pMLC2. In contrast, this did not occur in the sh-NDRG1 cells probably due to the inefficient chelator-mediated up-regulation of NDRG1 in these cells (see Figure 9C). Scale Bar: 25  $\mu$ m. (C) Fluorescence quantification of both F-actin and pMLC2 expression showed an inhibitory effect of chelator treatment in sh-Control cells. Results in (A) and (B) are typical of 3 experiments, while the densitometry represents mean  $\pm$  SD (3 experiments). \*\*\*  $p < 0.001$ , relative to cells incubated with the Vehicle or Dp2mT.
